# Supplementary material for: A deep learning approach to predict the results of root coverage procedures: a retrospective study
Source: Research Square preprint supplement (doi:10.21203/rs.3.rs-7234758/v1), 2025-08-22
Supplement: Supplementary file 1 [file c7908634768fe5a27bc815fd.docx]

**The YOLO v8-seg model extends the original YOLO v8 architecture by incorporating a segmentation head, enabling pixel-level instance segmentation of target objects. It adopts an encoder-decoder structure: the encoder extracts hierarchical image features through convolutional layers, while the decoder progressively upsamples these features to generate a segmentation mask of the same resolution as the input image. Specifically, YOLO v8-seg performs tooth region segmentation by training on a large-scale annotated dental dataset, achieving precise delineation of actual tooth boundaries through multi-scale feature fusion and attention mechanisms.**

**The YOLOv8-pose consists of four key components:**

1. **Input Layer: Accepts image inputs and dynamically resizes them to the model's specified dimensions.**
2. **Backbone Network: Employs a Spatial Pyramid Pooling-Fast (SPPF) module to enhance multi-scale feature extraction, generating hierarchical high-dimensional feature representations.**
3. **Neck Network: Fuses multi-level feature maps via feature pyramid aggregation and attention-guided refinement, integrating spatial context and semantic information to improve key points localization accuracy and robustness against occlusion/scale variations.**
4. **Head Network: Predicts key points coordinates and confidence scores based on the fused feature maps, using a Gaussian heatmap-based regression approach with offset refinement for sub-pixel precision.**

**The YOLO v8 model variants are designed based on the principle of balancing task complexity and computational efficiency:**

1. **For the YOLO v8-Seg task: The nano version (n) is employed, with a network depth coefficient of 0.33 and a width coefficient of 0.25. This configuration strikes a balance between the sensitivity requirement of the segmentation task for local features and the need for real-time performance.**
2. **For the YOLO v8-Pose task: The x-large version (x) is selected, featuring a depth coefficient of 1.0 and a width coefficient of 1.25. This setup enhances the geometric modeling capability for key points detection.**

The Adam optimization algorithm is selected for the optimization process, with the initial learning rate set at 0.001. During the training phase, a cosine annealing learning rate adjustment strategy is adopted. As the number of training epochs increases, the learning rate gradually decreases, thereby improving the model's convergence speed and stability.

In addition to the class loss (Lcls), box loss (Lbox), and distribution focal loss (Ldfl), the loss function of YOLOv8-seg also incorporates a segmentation mask loss (Lseg), which is utilized to optimize various aspects of the instance segmentation task's performance. For YOLOv8-pose, the loss computation encompasses Lcls, Lbox, Ldfl, key point loss (Lkpts), and key point objectness loss (Lkobj). The Lcls function employs binary cross-entropy (BCE) to quantify the discrepancy between the model's predicted categories and the ground truth labels. The Lbox is calculated using complete intersection over union loss (LCIoU) and Ldfl. The LCIoU measures the differences in position, overlap, and aspect ratio between the predicted and ground truth bounding boxes, ensuring precise localization. The Ldfl optimizes the distribution prediction of bounding box coordinates, enhancing the model's ability to localize small and densely packed objects. The Lkpts monitors the similarity between predicted and actual key points, with the euclidean distance (ED) between corresponding key points being the primary component of this loss. The Lkobj calculates the distance associated with the presence of key points; in YOLOv8, this distance is measured using BCE between the predicted and actual values.
